# Supplementary material for: Trail pheromone identification in the ant Crematogaster scutellaris
Source: PubMed Central journal article supplement (PMC10991323; doi:10.1038/s41598-024-58383-2), 2024-04-03
Supplement: 41598_2024_58383_MOESM3_ESM.pdf [file 41598_2024_58383_MOESM3_ESM.pdf]

## Supplementary information

**Supplementary Table S1.** Adjusted *p*-values for Dunnett's multiple comparisons test: Different Substances/concentrations vs. control. Significant results are labelled red.

| Dunnett's multiple comparisons test | Mean Diff. | 95.00% CI of diff. | Adjusted <i>p</i> -value |
|-------------------------------------|------------|--------------------|--------------------------|
| Control vs. Solvent                 | -0.31      | -1.3 to 0.67       | 0.9779                   |
| Control vs. Dodec 0.001             | -0.11      | -1.1 to 0.86       | 0.9996                   |
| Control vs. Dodec 0.01              | -0.25      | -1.3 to 0.72       | 0.9921                   |
| Control vs. Dodec 0.1               | -1.2       | -2.2 to -0.24      | 0.0059                   |
| Control vs. Dodec 1                 | -1.7       | -2.7 to -0.68      | <0.0001                  |
| Control vs. Dodec 10                | -1.5       | -2.5 to -0.48      | 0.0005                   |
| Control vs. Tridec 0.001            | -0.27      | -1.3 to 0.71       | 0.9907                   |
| Control vs. Tridec 0.01             | -0.85      | -1.9 to 0.13       | 0.1199                   |
| Control vs. Tridec 0.1              | -1.2       | -2.2 to -0.25      | 0.0053                   |
| Control vs. Tridec 1                | -1.2       | -2.3 to -0.26      | 0.0048                   |
| Control vs. Tridec 10               | -1.2       | -2.2 to -0.21      | 0.0080                   |
| Control vs. Hindtibia extract       | -1.2       | -2.2 to -0.22      | 0.0070                   |

**Supplementary Table S2.** Multiple *t*-tests: 2-dodecanol vs. 2-tridecanol at specific concentrations.

|         | <i>p</i> -value | Mean of 2-dodecanol | Mean of 2-tridecanol | Difference | SE of difference | <i>df</i> |
|---------|-----------------|---------------------|----------------------|------------|------------------|-----------|
| Control | >0.99           | 5.7                 | 5.7                  | 0          | 1.6              | 28        |
| Solvent | >0.99           | 8.1                 | 8.1                  | 0          | 2.3              | 28        |
| 0.001   | 0.85            | 6.4                 | 6.1                  | 0.32       | 1.7              | 28        |
| 0.01    | 0.055           | 7.4                 | 12.5                 | -5.0       | 2.6              | 28        |
| 0.1     | 0.91            | 23.0                | 24.9                 | -0.93      | 8.0              | 28        |
| 1       | 0.44            | 33.3                | 25.9                 | 7.4        | 9.3              | 28        |
| 10      | 0.81            | 35                  | 32                   | 3.0        | 12               | 28        |

**Supplementary Table S3.** Adjusted *p*-values for Dunnett's multiple comparisons test: Different Enantiomers/concentrations vs. control. Significant results are labelled red.

| Dunnett's multiple comparisons test | Mean Diff. | 95.00% CI of diff. | Adjusted <i>p</i> -value |
|-------------------------------------|------------|--------------------|--------------------------|
| Control vs. Solvent                 | -0.31      | -1.3 to 0.68       | 0.99                     |
| Control vs. R 0.001                 | -1.1       | -2.0 to -0.10      | 0.021                    |
| Control vs. R 0.01                  | -1.4       | -2.5 to -0.43      | 0.0007                   |
| Control vs. R 0.1                   | -1.7       | -2.7 to -0.68      | <0.0001                  |
| Control vs. R 1                     | -1.6       | -2.6 to -0.62      | <0.0001                  |
| Control vs. R 10                    | -1.8       | -2.8 to -0.81      | <0.0001                  |
| Control vs. S 0.001                 | -0.38      | -1.4 to 0.61       | 0.96                     |
| Control vs. S 0.01                  | -0.50      | -1.5 to 0.49       | 0.76                     |
| Control vs. S 0.1                   | -0.70      | -1.7 to 0.30       | 0.35                     |
| Control vs. S 1                     | -1.7       | -2.8 to -0.76      | <0.0001                  |
| Control vs. S 10                    | -1.8       | -2.8 to -0.78      | <0.0001                  |
| Control vs. Hindtibia extract       | -1.2       | -2.2 to -0.21      | 0.0075                   |

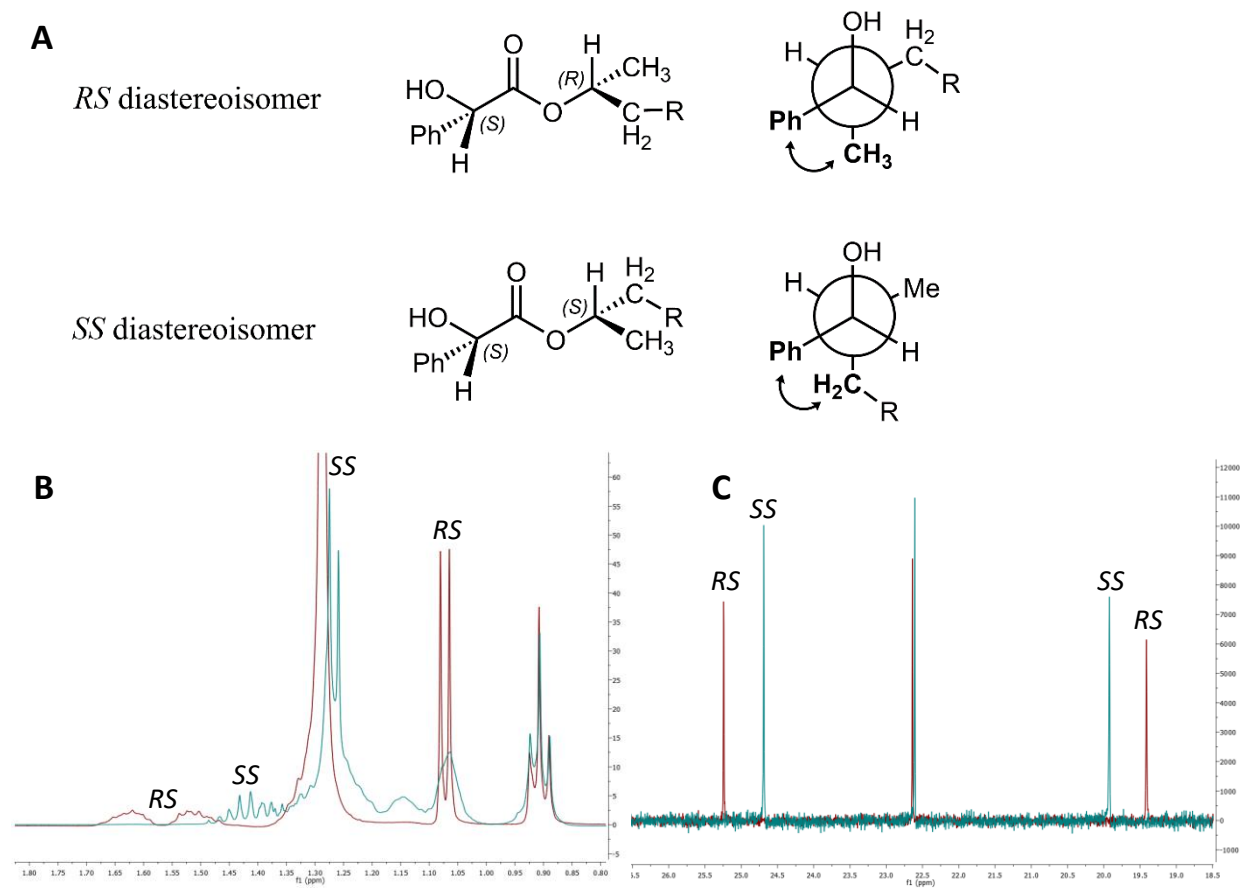

**Supplementary Figure S1.** Determination by NMR analysis<sup>1</sup> of absolute stereochemistry for the esters formed by the reaction of racemic 2-tridecanol and (+)-(*S*)-mandelic acid. **(A)** Anisotropic shielding is highlighted in Newman projections for *RS* and *SS* diastereoisomers. The proximity of the phenyl ring causes a shielding effect to the CH<sub>3</sub> group in *RS* diastereoisomer and to the CH<sub>2</sub>-R group in the *SS* diastereoisomer. **(B)** <sup>1</sup>H-NMR spectra of *RS* (red) and *SS* (blue) esters. CH<sub>3</sub> signal of *RS* (d, 1.06 ppm) and CH<sub>2</sub>-R signal of *SS* (m, 1.48-1.36 ppm) are shielded due to the proximity of the phenyl group. On the contrary, CH<sub>3</sub> signal of *SS* (d, 1.26 ppm) and CH<sub>2</sub>-R signals of *RS* (m, 1.69-1.57 ppm and m, 1.55-1.45 ppm) result more deshielded. **(C)** <sup>13</sup>C-NMR spectra of *RS* (red) and *SS* (blue) esters. CH<sub>2</sub>-R signal of *SS* (24.7 ppm) and CH<sub>3</sub> signal of *RS* ester (19.4 ppm) are more shielded in comparison with their signals in the other diastereoisomer.

1. Salvatore, B. A. Physical methods and techniques. NMR Spectroscopy. *Annu. Reports Sect. 'B' (Organic Chem.* **95**, 395–417 (1999).

**Supplementary Video S1:** Exemplary video of an ant exposed to a trail of 2-tridecanol at a concentration of 1 ng/μl. Displayed parameters are time in frames (≈160 ms frame time), the *x,y*-position in pixels (≈1 mm pixel size), and the perpendicular distance to the trail line in cm.

**Supplementary Video S2:** Control experiment without any substance applied to the trail. Displayed parameters are time in frames (≈160 ms frame time), the *x,y*-position in pixels (≈1 mm pixel size), and the perpendicular distance to the trail line in cm.
